# Supplementary material
Source: PubMed Central journal article supplement (PMC4388615)

## A

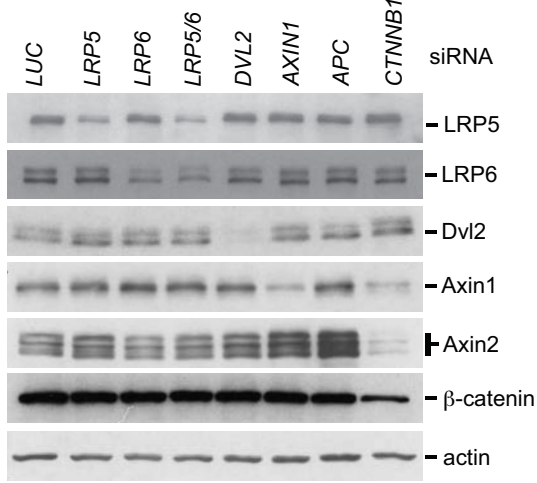

## B

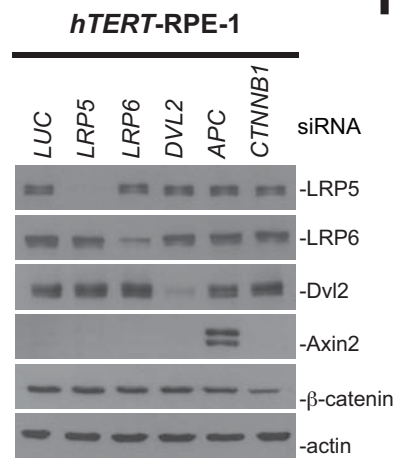

## C

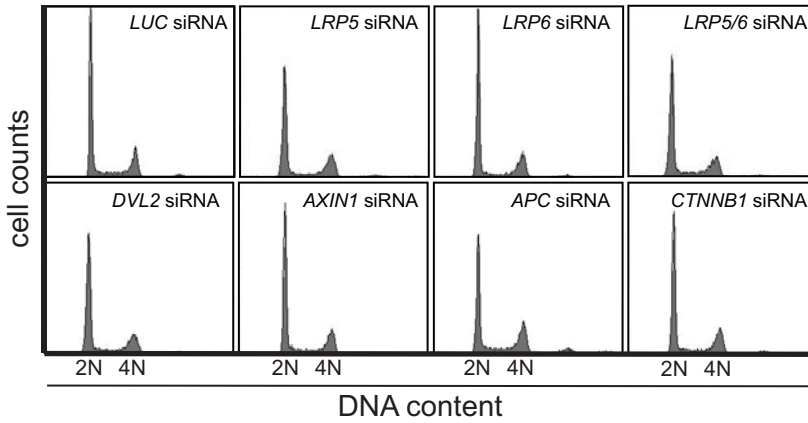

## D

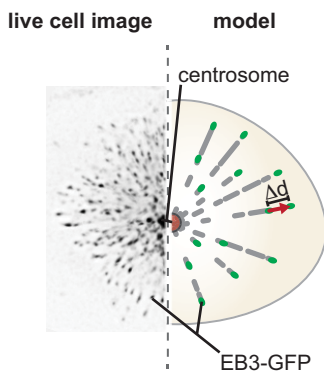

## E

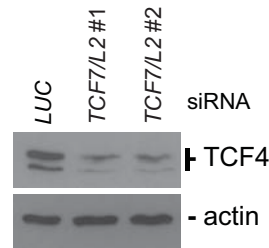

## F

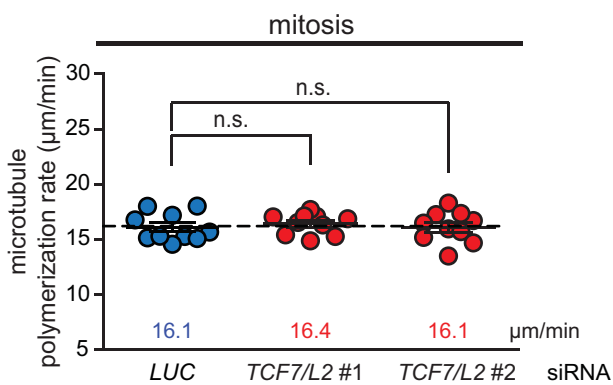

## G

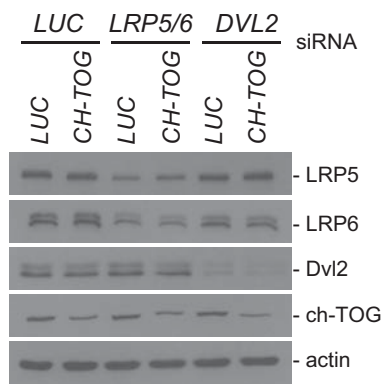

Supplement: embr0016-0490-sd1.pdf [file embr0016-0490-sd1.pdf]

# Figure S2

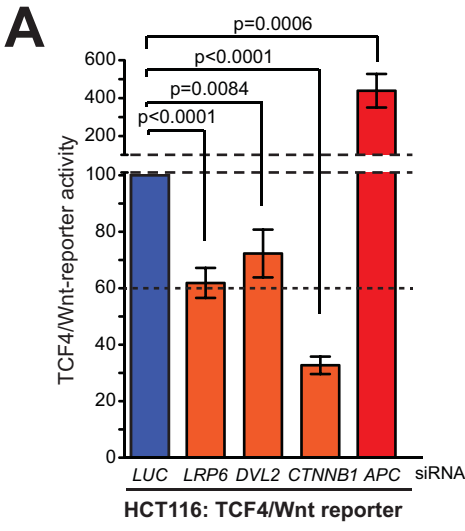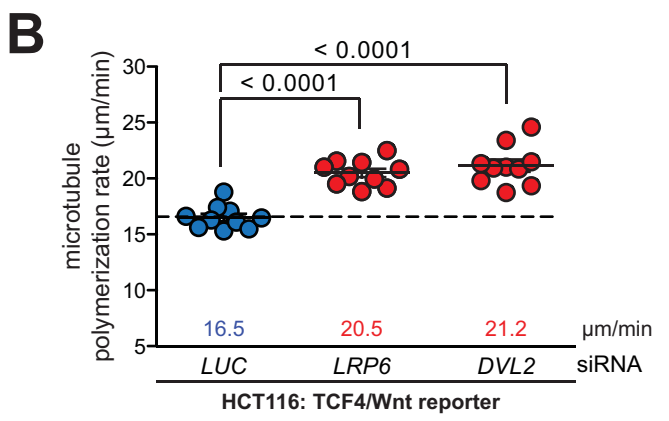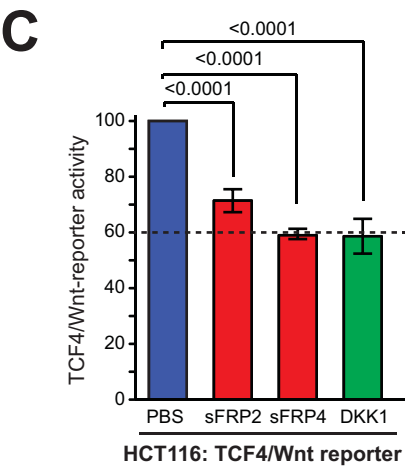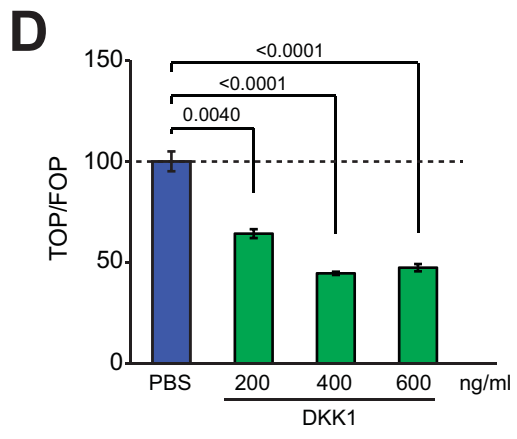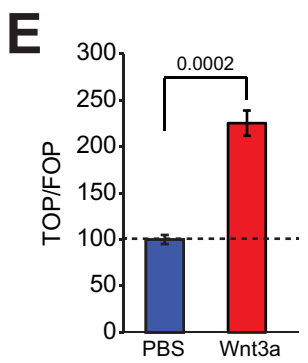

Supplement: embr0016-0490-sd2.pdf [file embr0016-0490-sd2.pdf]

# Figure S3

**A**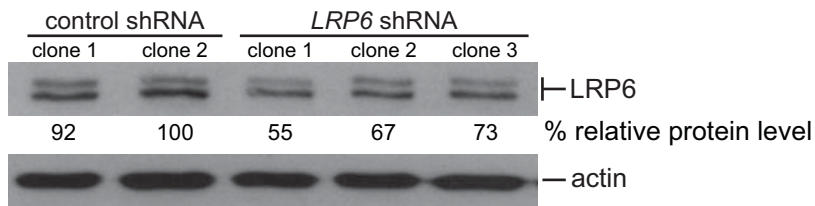**B**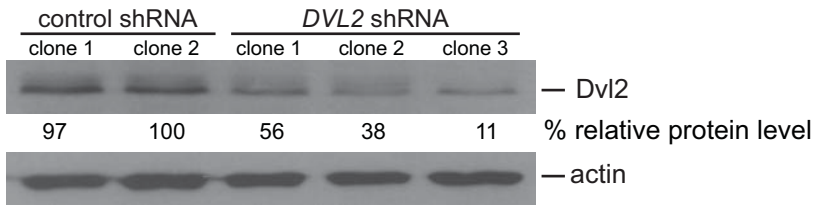

Supplement: embr0016-0490-sd3.pdf [file embr0016-0490-sd3.pdf]

## A

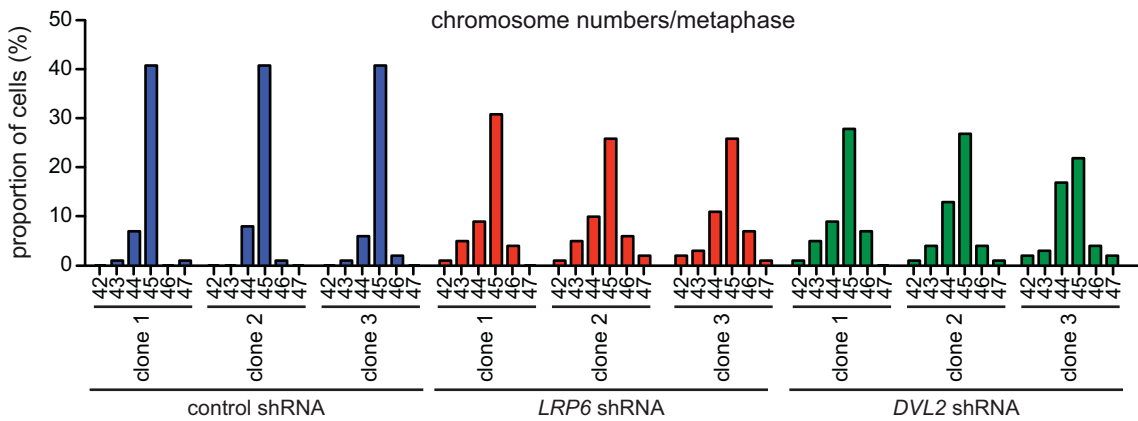

## B

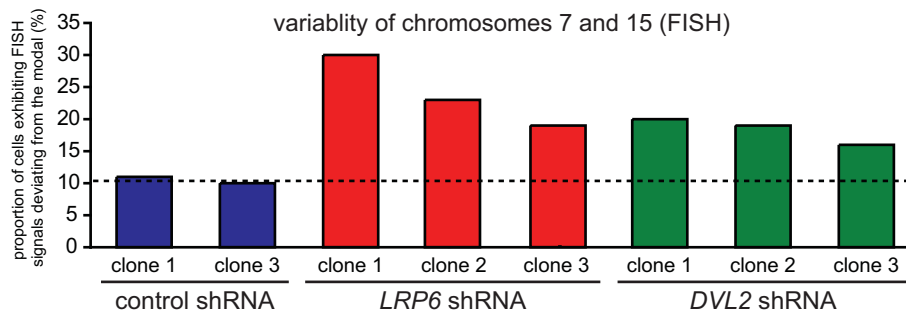

## C

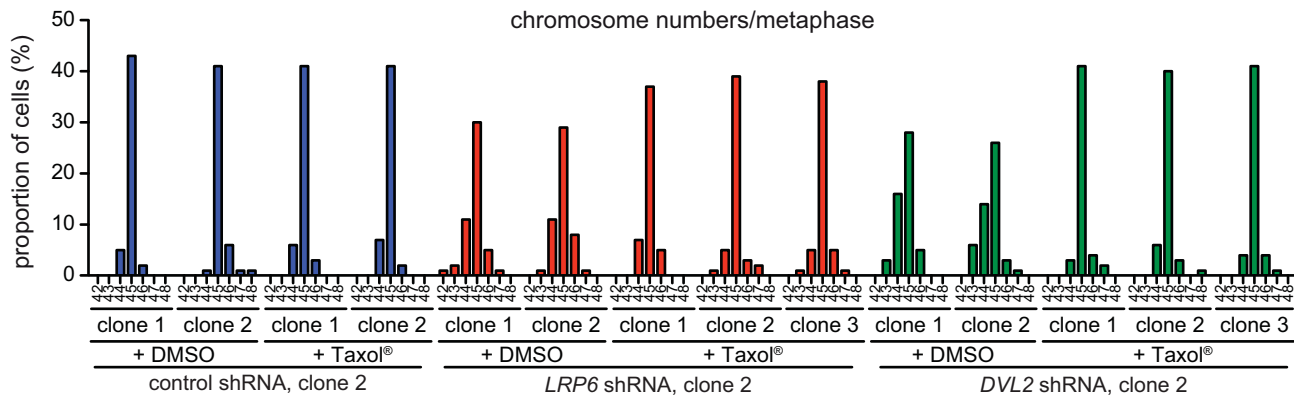

Supplement: embr0016-0490-sd4.pdf [file embr0016-0490-sd4.pdf]

## A

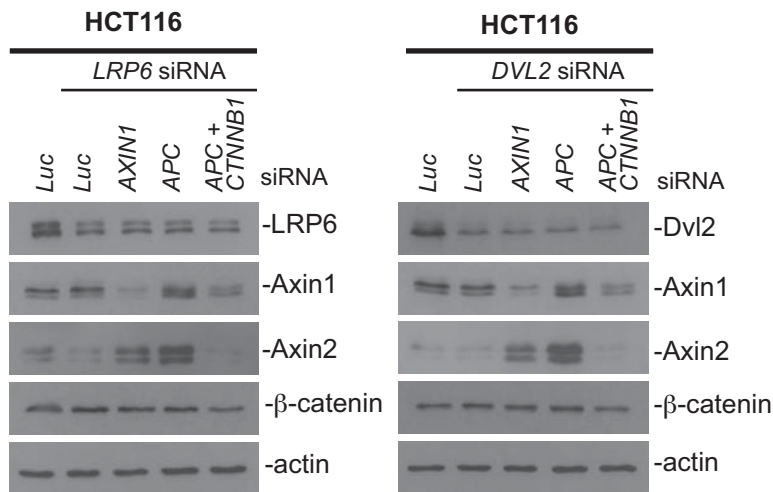

## B

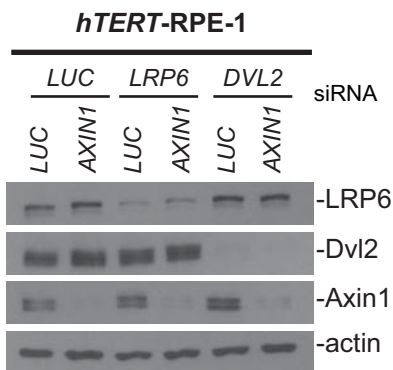

## C

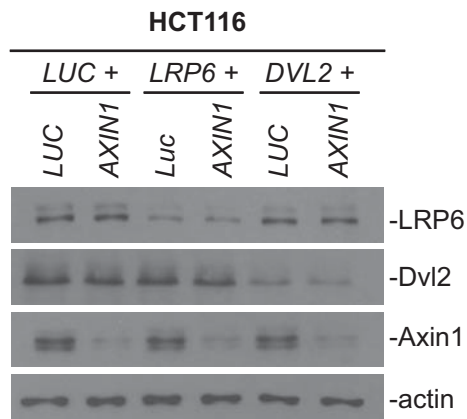

Supplement: embr0016-0490-sd5.pdf [file embr0016-0490-sd5.pdf]

Figure S6

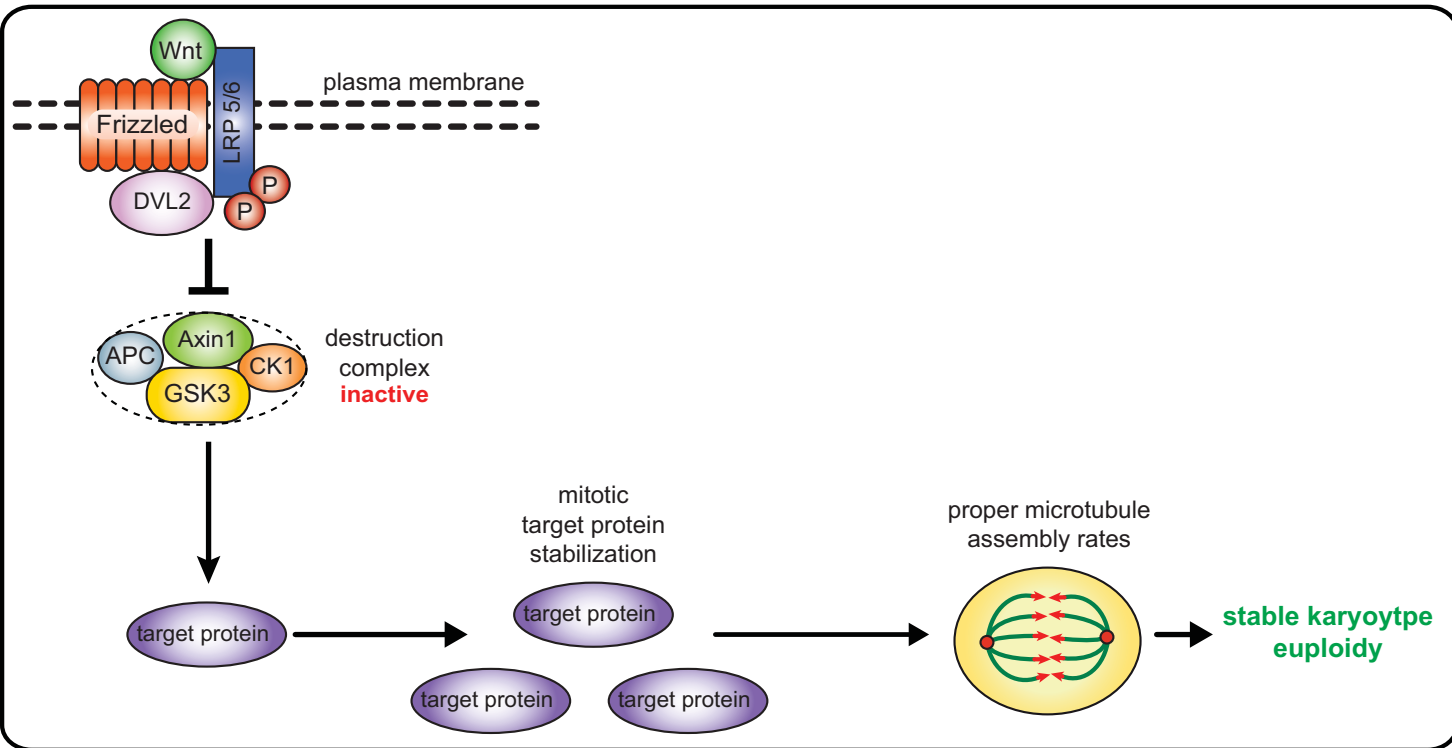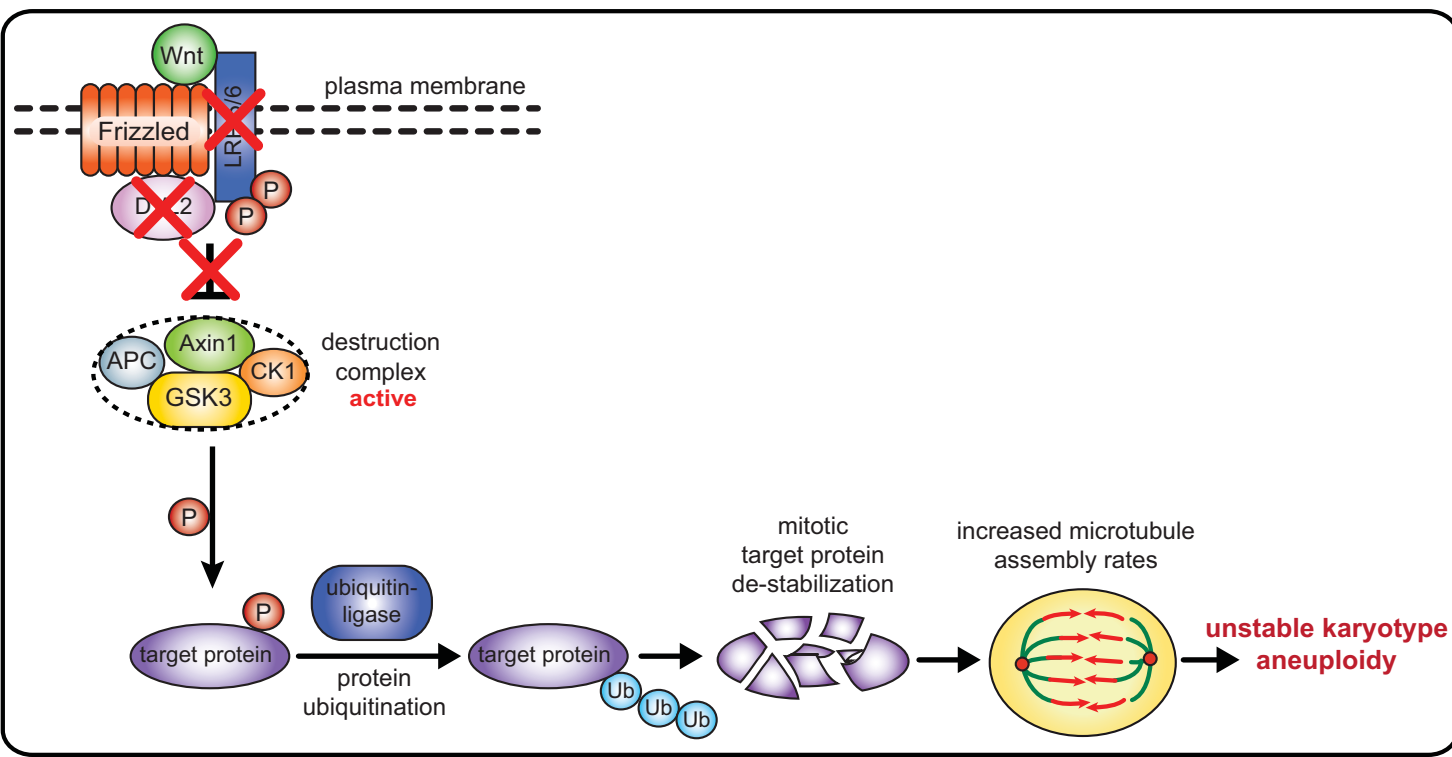

Supplement: embr0016-0490-sd6.pdf [file embr0016-0490-sd6.pdf]
